# Supplementary material for: A dopamine metabolite stabilizes neurotoxic amyloid-β oligomers
Source: PubMed Central journal article supplement (PMC7782527; doi:10.1038/s42003-020-01490-3), 2021-01-04
Supplement: 42003_2020_1490_MOESM2_ESM.pdf [file 42003_2020_1490_MOESM2_ESM.pdf]

## **Description of Additional Supplementary Files**

File Name: Supplementary Data 1

Description: Source data
